# Supplementary material
Source: PubMed Central journal article supplement (PMC4656203)
Supplement: 14_192_Odin_Suppl.pdf [file 14_192_Odin_Suppl.pdf]

## Supplemental Data

# Expression of Folate Pathway Genes in Stage III Colorectal Cancer Correlates with Recurrence Status Following Adjuvant Bolus 5-FU-Based Chemotherapy

Elisabeth Odin,<sup>1</sup> Arvid Sondén,<sup>2</sup> Bengt Gustavsson,<sup>1</sup> Göran Carlsson,<sup>1</sup> Yvonne Wettergren<sup>1</sup>

Online address: <http://www.molmed.org>

The Feinstein Institute  
for Medical Research   
Empowering Imagination. Pioneering Discovery.®

**Supplementary Table S1.** Enzyme Commission (EC) numbers and locations of enzymes encoded by 15 genes involved in folate metabolism and folate polyglutamation.

| Gene    | EC number | Enzyme location <sup>a</sup> |
|---------|-----------|------------------------------|
| AMT     | 2.1.2.10  | M                            |
| ATIC    | 2.1.2.3   | M, C                         |
| ATIC    | 3.5.4.10  | M, C                         |
| ALDH1L1 | 1.5.1.6   | C                            |
| ALDH1L2 | 1.5.1.6   | M                            |
| FPGS    | 6.3.2.17  | C, M                         |
| FTCD    | 2.1.2.5   | C, G                         |
| FTCD    | 4.3.1.4   | C, G                         |
| GART    | 2.1.2.2   | C                            |
| GART    | 6.3.3.1   | C                            |
| GART    | 6.3.4.13  | C                            |
| GGH     | 3.4.19.9  | C, E, L, Me                  |
| MTHFD1  | 1.5.1.5   | C                            |
| MTHFD1  | 3.5.4.9   | C                            |
| MTHFD1  | 6.3.4.3   | C                            |
| MTHFD1L | 6.3.4.3   | M                            |
| MTHFD2  | 1.5.1.15  | M                            |
| MTHFD2  | 3.5.4.9   | M                            |
| MTFMT   | 2.1.2.9   | M                            |
| MTHFS   | 6.3.3.2   | C, G, P                      |
| SHMT1   | 2.1.2.1   | C, M, N                      |
| SHMT2   | 2.1.2.1   | M, T                         |

<sup>a</sup>Data obtained from the National Center for Biotechnology Information (NCBI; <http://www.ncbi.nlm.nih.gov/>).

C, cytoplasm; E, extracellular space; G, Golgi apparatus; L, lysosome; M, mitochondria; Me, melanosome; N, nucleus; P, plasma membrane; T, microtubule.
